# Supplementary material for: Prognosis of immune checkpoint inhibitors-induced myocarditis: a case series
Source: PubMed Central journal article supplement — J Immunother Cancer. 2023 May 31;11(5):e004792. doi: 10.1136/jitc-2022-004792 (PMC10254993; doi:10.1136/jitc-2022-004792), 2023-05-31
Supplement: jitc-2022-004792supp001.pdf [file jitc-2022-004792supp001.pdf]

**Supplementary Table 1: Definitions for ICI-induced myocarditis (adapted from Herrmann et al.<sup>8</sup>)****IC-OS 2021 Consensus<sup>8</sup>****1/ Either pathohistological diagnosis:**

Multifocal inflammatory cell infiltrates with overt cardiomyocyte loss by light microscopy of cardiac tissue samples

**2/ Or clinical diagnosis:**

A troponin elevation (new, or significant change from baseline) with 1 major criterion or a troponin elevation (new, or significant change from baseline) with 2 minor criteria after exclusion of acute coronary syndrome or acute infectious myocarditis based on clinical suspicion

**Major Criterion**

CMR diagnostic for acute myocarditis (modified Lake Louise criteria)

**Minor Criteria**

- **Clinical syndrome** (including any one of the following: fatigue, muscle weakness, myalgias, chest pain, diplopia, ptosis, shortness of breath, orthopnea, lower extremity edema, palpitations, lightheadedness/dizziness, syncope, cardiogenic shock)
- Ventricular **arrhythmia** and/or new **conduction system disease**
- **Decline in cardiac (systolic) function**, with or without regional WMA in a non-Takotsubo pattern
- **Other immune-related adverse events**, particularly myositis, myopathy, myasthenia gravis
- **Suggestive CMR** (meeting some -but not all- of the modified Lake Louise criteria)

**Modifiers****Severity of Myocarditis**

|                                     |                                                                                                                                                                      |
|-------------------------------------|----------------------------------------------------------------------------------------------------------------------------------------------------------------------|
| Severe                              | Hemodynamic instability, heart failure requiring non-invasive or invasive ventilation, complete or high-grade heart block, and/or significant ventricular arrhythmia |
| Non-Severe (clinically significant) | Symptomatic but hemodynamically and electrically stable, may have reduced LVEF, no features of severe disease                                                        |
| Smoldering (sub-clinical)           | Incidentally diagnosed myocarditis without any clinical signs or symptoms                                                                                            |

**Recovery from Myocarditis**

|                   |                                                                                                                                                                   |
|-------------------|-------------------------------------------------------------------------------------------------------------------------------------------------------------------|
| Complete Recovery | Patients with complete resolution of acute symptoms, normalization of biomarkers and recovery of LVEF after discontinuation of immunosuppressants                 |
| Recovering        | Ongoing improvement in patient clinical symptoms, signs, biomarkers and imaging parameters, but not yet normalized, while on tapering doses of immunosuppressants |

**Bonaca et al.<sup>9</sup>**

|                   |                                                                                                                                                                                                                                                 |
|-------------------|-------------------------------------------------------------------------------------------------------------------------------------------------------------------------------------------------------------------------------------------------|
| <b>Definitive</b> | Pathology<br>OR<br>Diagnostic CMR + syndrome + biomarker or ECG<br>OR<br>Echo WMA + syndrome + biomarker + ECG + negative angiography                                                                                                           |
| <b>Probable</b>   | Diagnostic CMR (no syndrome, ECG, biomarker)<br>OR<br>Suggestive CMR with either syndrome, ECG or biomarker<br>OR<br>Echo WMA and syndrome (with either biomarker or ECG)<br>OR<br>Syndrome with PET scan evidence and no alternative diagnosis |
| <b>Possible</b>   | Suggestive CMR with no syndrome, ECG or biomarker<br>OR<br>Echo WMA with syndrome or ECG only<br>OR<br>Elevated biomarker with syndrome or ECG and no alternative diagnosis                                                                     |
