# Supplementary material for: Prognosis of immune checkpoint inhibitors-induced myocarditis: a case series
Source: PubMed Central journal article supplement — J Immunother Cancer. 2023 May 31;11(5):e004792. doi: 10.1136/jitc-2022-004792 (PMC10254993; doi:10.1136/jitc-2022-004792), 2023-05-31
Supplement: jitc-2022-004792supp002.pdf [file jitc-2022-004792supp002.pdf]

**Supplementary table S1:** Individual description of clinical and paraclinical features, treatment modalities and outcomes according to Bonaca<sup>9</sup> and Hermann<sup>8</sup>.

| Sex | Age (years) | CV risk factors | Previous AI | Cancer type | Stage | ICI | Time to onset (d) | Clinical symptoms | High Tn/BNP (y/n) | ECG | TTE          | CMR         | Angiography / EMB    | Associated irAEs | Bonaca grading          | Severity* | Treatment   | Outcome*                 | Follow-up (days) |     |
|-----|-------------|-----------------|-------------|-------------|-------|-----|-------------------|-------------------|-------------------|-----|--------------|-------------|----------------------|------------------|-------------------------|-----------|-------------|--------------------------|------------------|-----|
| 1   | M           | 69              | D; S        | Ps          | HCC   | III | PD1               | 181               | -                 | +/+ | n            | n           | LGE; ↑T1m            | -/-              | Th                      | Pro       | Sm / 2      | GC                       | R; CRD           | 87  |
| 2   | F           | 71              | DI; HBP; S  | -           | NSCLC | IV  | PD1               | 2                 | CP; Dy; M; Pa     | +/+ | LAF B        | DSF         | DSF; LGE             | -/-              | SS                      | Pro       | CS / 3      | GC                       | R; CRD           | 49  |
| 3   | M           | 54              | S           | Vi          | Me    | IV  | CTL4 + PD1        | 63                | CP; M; Pa         | +/- | n            | DSF         | LGE                  | -/-              | CNS; De; He; My; Th     | Pro       | CS / 3      | GC                       | CR; NIC          | 830 |
| 4   | M           | 64              | D; HBP; S   | ILD         | NSCLC | III | PDL1              | 43                | Dy; LLO; M; Pa    | +/- | n            | n           | LGE; ↑T1m; ↑T2m; T2O | -/-              | He; MG; My; SS; Th      | Def       | Se (HF) / 4 | GC; IVIg; MMF; MTX; PLEx | R                | 486 |
| 5   | F           | 70              | HBP         | -           | UTC   | IV  | PD1               | 26                | CP; Dy; LLO       | +/+ | DNT W        | DSF; ↓GL S  | DSF; LGE; T2O        | +/-              | SS                      | Def       | CS / 3      | GC; PLEx                 | R; CRD           | 69  |
| 6   | F           | 33              | S           | -           | NSCLC | IV  | PD1               | 20                | LLO               | +/+ | DNT W; PVC   | WM A; ↓GL S | LGE; ↑T1m; T2O       | -/-              | SS; Th                  | Def       | CS / 3      | GC; PLEx                 | R; CRD           | 144 |
| 7   | M           | 71              | S           | My; Ne      | NSCLC | IV  | PD1               | 64                | Sy                | +/- | HGH B        | ↓GL S       | LGE; ↑T2m; T2O       | +/+              | SS                      | Def       | Se / 4      | GC                       | CR; NIC          | 325 |
| 8   | F           | 53              | -           | ANA         | Me    | IV  | CTL4 + PD1        | 46                | Dy; M; Pa         | +/+ | n            | n           | n                    | -/-              | He; My; Pn; SS          | Po        | CS / 3      | GC; IVIg; MTX; PLEx      | R; NIC; CRD      | 288 |
| 9   | M           | 80              | HBP; S      | -           | UTC   | IV  | PD1               | 50                | LLO               | +/+ | PVC          | WM A        | LGE; T2O             | -/-              | SS                      | Pro       | CS / 3      | GC; PLEx                 | R                | 299 |
| 10  | F           | 84              | D           | MG          | Me    | IV  | PD1               | 17                | Dy                | +/+ | DNT W; LBB B | n           | LGE; T2O             | +/+              | He; MG exacerbation; My | Def       | Se (HF) / 5 | GC; PLEx                 | MRD              | 19  |
| 11  | M           | 70              | DI; HBP; S  | -           | GAc   | IV  | CTL4 + PD1        | 63                | -                 | +/+ | DNT W        | DSF         | DSF                  | -/-              | CNS; He; Th             | Po        | Sm / 2      | GC                       | CR               | 287 |

| Sex | Age (years) | CV risk factors | Previous AI | Cancer type | Stage | ICI  | Time to onset (d) | Clinical symptoms | High Tn/BNP (y/n) | ECG    | TTE   | CMR | Angiography / EMB     | Associated irAEs | Bonaca grading  | Severity* | Treatment   | Outcome *      | Follow-up (days) |     |
|-----|-------------|-----------------|-------------|-------------|-------|------|-------------------|-------------------|-------------------|--------|-------|-----|-----------------------|------------------|-----------------|-----------|-------------|----------------|------------------|-----|
| 12  | F           | 50              | S           | HT; CL      | UTC   | IV   | PD1+Ox40          | 35                | CP; Dy            | +/+    | DNT W | DSF | LGE                   | +/-              | He; My; Pn; PNS | Def       | CS / 3      | GC; IVIg       | CR               | 832 |
| 13  | M           | 75              | DI; HBP; S  | My          | UTC   | IV   | PD1+Ox40          | 15                | Dy; M             | + / NS | AF    | n   | LGE                   | +/-              | My exacerbation | Def       | Se (HF) / 5 | GC             | MRD              | 123 |
| 14  | M           | 83              | S           | -           | NSCLC | IV   | PD1               | 44                | -                 | +/-    | n     | DSF | n                     | +/-              | My              | Po        | Sm / 2      | GC             | CR; CRD          | 333 |
| 15  | M           | 61              | -           | -           | Me    | IV   | PD1               | 83                | Dy                | +/+    | HGH B | DSF | LGE; ↑T1m             | -/-              | Co; Th          | Pro       | Se / 4      | Cy; GC; IVIg   | CR               | 252 |
| 16  | M           | 69              | D; S        | -           | NSCLC | IV   | PD1               | 35                | Dy                | +/+    | n     | DSF | NS                    | -/-              | MG              | Pro       | CS / 3      | GC; IVIg; MTX  | R                | 665 |
| 17  | M           | 74              | DI; S       | -           | NSCLC | IV   | PD1               | 126               | Dy; Pa            | + / NS | AF    | DSF | n                     | +/-              | -               | Def       | Se (HF) / 4 | GC             | R                | 474 |
| 18  | M           | 83              | -           | PMR         | CEC   | IIIb | PD1               | 36                | F; M              | + / NS | HGH B | NS  | NS                    | -/-              | He; MG; My; SS  | Po        | Se / 5      | GC; IVIg; PLEx | MRD              | 22  |
| 19  | M           | 76              | -           | ANA; Ps     | Me    | IV   | CTL4 + PD1        | 31                | M                 | +/+    | n     | NS  | LGE; ↑T1m; ↑T2m       | -/-              | PNS; SS         | Pro       | Sm / 2      | GC; PLEx       | CR               | 148 |
| 20  | F           | 69              | S           | ANA         | Me    | IV   | CTL4 + PD1        | 21                | CP                | +/-    | SVT   | n   | ↑T1m; ↑T2m            | +/-              | Pn              | Pro       | CS / 2      | GC             | R; NIC           | 807 |
| 21  | M           | 71              | D; HBP      | -           | Me    | IV   | CTL4 + PD1        | 39                | Dy                | +/-    | DNT W | n   | ↑LGE; ↑T1m; ↑T2m; T2O | -/-              | Th              | Def       | CS / 2      | GC             | CR; NIC          | 811 |
| 22  | M           | 56              | -           | -           | Me    | III  | PD1               | 75                | CP                | +/-    | DNT W | n   | LGE; ↑T2m             | + / (↑)          | De; Hy; SS      | Pro       | CS / 2      | GC             | R                | 101 |

|    | Sex | Age (years) | CV risk factors | Previous AI | Cancer type | Stage | ICI         | Time to onset (d) | Clinical symptoms | High Tn/BNP (y/n) | ECG  | TTE | CMR  | Angiography / EMB | Associated irAEs | Bonaca grading | Severity* | Treatment           | Outcome * | Follow-up (d) |
|----|-----|-------------|-----------------|-------------|-------------|-------|-------------|-------------------|-------------------|-------------------|------|-----|------|-------------------|------------------|----------------|-----------|---------------------|-----------|---------------|
| 23 | M   | 64          | DI; HBP; S      | -           | NSCLC       | IV    | PD1         | 126               | Dy                | +/+               | LBBB | DSF | NS   | -/-               | -                | Pro            | Se (HF)/5 | GC                  | MRD       | 50            |
| 24 | M   | 62          | S               | -           | NSCLC       | IV    | PDL1        | 21                | CP; Dy            | +/+               | AF   | DSF | NS   | +/+               | -                | Def            | Se (HF)/5 | GC                  | MRD       | 40            |
| 25 | F   | 69          | S               | ANA         | HCC         | IV    | CTL4 + PD1  | 16                | Dy; M             | +/-               | AIVR | n   | LGE  | +/-               | My; Th           | Po             | CS / 3    | GC; IVIg; PLEx      | R         | 70            |
| 26 | F   | 52          | S               | -           | CC          | IV    | CTL4 + PDL1 | 35                | F; LLO            | +/-               | n    | n   | ↑T1m | +/+               | My; SS; Th       | Def            | CS / 3    | GC                  | R         | 32            |
| 27 | M   | 66          | S               | -           | HCC         | III   | PDL1        | 32                | Dy; LLO; M        | +/+               | n    | WMA | n    | +/+               | De; MG; My       | Def            | Se (HF)/5 | GC                  | MRD       | 8             |
| 28 | M   | 78          | S               | -           | NSCLC       | IV    | PD1         | 42                | CP; Dy; LLO       | +/+               | RBB  | n   | n    | -/-               | My               | Po             | Se (HF)/5 | GC; IVIg; MMF; PLEx | MRD       | 37            |
| 29 | M   | 72          | -               | -           | NSCLC       | IV    | PD1         | 58                | Dy                | +/+               | AF   | n   | n    | +/-               | -                | Po             | CS / 3    | -                   | NIC; CRD  | 183           |

AF: atrial fibrillation; AI: autoimmunity; AIVR: Accelerated idioventricular rhythm; ANA: antinuclear antibodies; CC: cholangiocarcinoma; CEC: cutaneous epidermoid carcinoma; CL: cutaneous lupus; CNS: central nervous system; Co: colitis; CP: chest pain; CR: complete recovery; CRD: cancer-related death; CS: clinically significant; CV: cardiovascular; Cy: cyclosporin; D: diabetes; De: dermatitis; Def: definite; DI: dyslipidaemia; DNTW: diffuse negative T waves; DSF: decline in systolic function; Dy: dyspnoea; EMB: endomyocardial biopsy; F: fatigue; GAc: gastric adenocarcinoma; GC: glucocorticoids; GLS: global longitudinal strain; HBP: high blood pressure; HCC: hepatocellular carcinoma; He: hepatitis; HF: heart failure; HGHB: high grade heart block; HT: Hashimoto thyroiditis; Hy: hypophysitis; ICI: immune checkpoint inhibitor; ILD: interstitial lung disease; IVIg: intravenous immunoglobulins; LAFB: left anterior fascicular block; LBBB: left bundle branch block; LC: lung cancer; LGE: late gadolinium enhancement; LLE: lower limbs oedema; M: myalgia; Me: melanoma; MG: myasthenia gravis; MMF: mycophenolate mofetil; MRD: myocarditis-related death; MTX: methotrexate; My: myositis; n: normal; Ne: neuropathy; NIC: new ICI challenge; NS: not specified; NSCLC: non-small cell lung cancer; Pa: palpitations; PLEx: plasma exchange; PMR: Polymyalgia rheumatica; Pn: pneumonitis; PNS: peripheral nervous system; Po: possible; Pro: probable; Ps: psoriasis; PVC: premature ventricular contractions; R: recovering; RBB: right bundle block; S: smoking; Se: severe; Sm: smoldering; SS: sicca syndrome; SVT: supra-ventricular tachycardia; Sy: syncope; T1m: T1 mapping; T2O: T2 oedema; Th: thyroiditis; UTC: urinary tract carcinoma; Vi: vitiligo; WMA: wall motion abnormality.

\* Severity is assessed according to IC-OS consensus statement (severe, clinically significant, smoldering) and CTCAE v5 (grade 1-5), and recovery is assessed according to IC-OS consensus statement.

† T lymphocytes infiltrate with insufficient density for myocarditis diagnosis.
