# Supplementary figures and images for: Prognosis of immune checkpoint inhibitors-induced myocarditis: a case series
Source: PubMed Central journal article supplement — J Immunother Cancer. 2023 May 31;11(5):e004792. doi: 10.1136/jitc-2022-004792 (PMC10254993; doi:10.1136/jitc-2022-004792), 2023-05-31

Supplementary figure 1: Flow chart

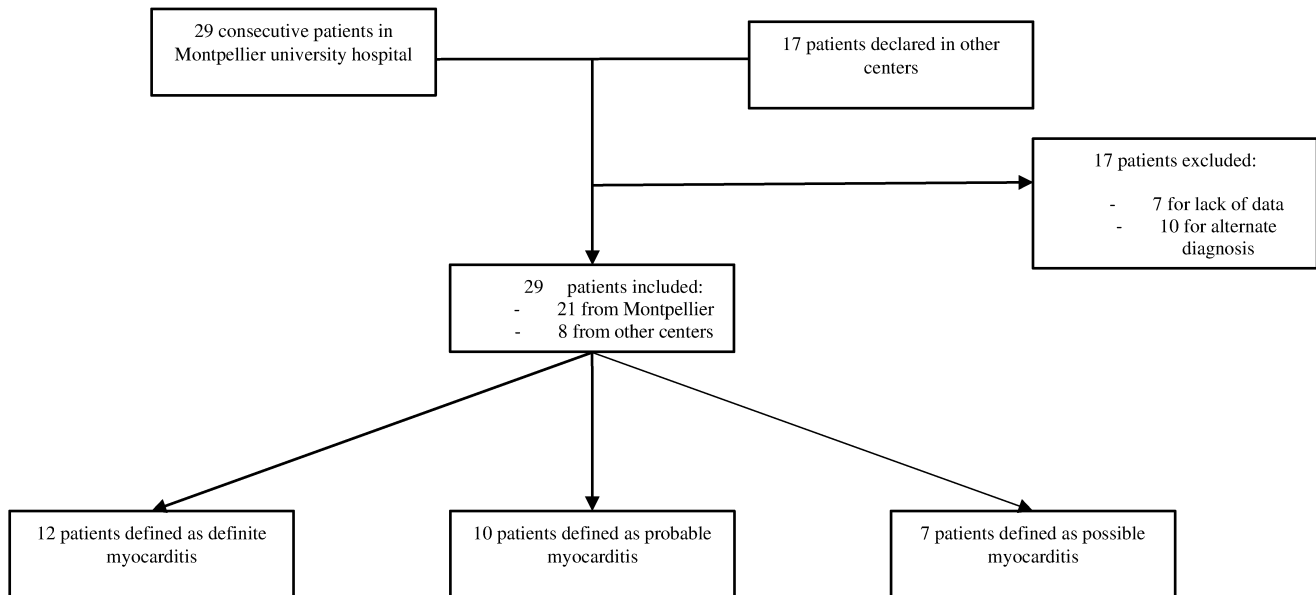

Supplement: jitc-2022-004792supp003.pdf [file jitc-2022-004792supp003.pdf]
